# Supplementary material for: Intermittent treatment of Escherichia coli biofilms leads to antibiotic resistance in vitro and in a pre-clinical in vivo model of catheter-related infection
Source: Research Square preprint supplement (doi:10.21203/rs.3.rs-7244857/v1), 2025-09-22
Supplement: Supplementary file 1 [file 1ffc1b7ef5fc640e21d15cfa.xlsx]

## Sheet: Sheet1
Table S1. Mutations identified using Breseq in end-point biofilm populations at a frequency higher than 5%
Experiment	Sample (TIVAP)	Locus name	Annotation	Mutations		Genomic position	Frequency(%)
LF82 in vitro LB experiment
	TIVAP 4_silicone septum	LF82_RS00065 →	molecular chaperone DnaK	L195R (CTG→CGG)		12.472	10.1
		LF82_RS00195 ←	crotonobetaine/carnitine‑CoA ligase	P333P (CCT→CCG)		38.428	27.4
		LF82_RS00195 ←	crotonobetaine/carnitine‑CoA ligase	F200V (TTC→GTC)		38.829	6.6
		LF82_RS00205 ←	crotonobetainyl‑CoA dehydrogenase	M168R (ATG→AGG)		41.484	9.1
		thiP ←	thiamine/thiamine pyrophosphate ABC transporter permease ThiP	L217R (CTG→CGG)		76.304	11
		LF82_RS00440 →	peptidoglycan glycosyltransferase FtsI	I151N (ATC→AAC)		93.072	7.6
		LF82_RS00460 →	UDP‑N‑acetylmuramoyl‑L‑alanine‑‑D‑glutamate ligase	K128N (AAA→AAC)		98.678	5.9
		LF82_RS00640 → / ← LF82_RS00645	UPF0231 family protein/adenosylmethionine decarboxylase	intergenic (+31/+7)		139.711	7.3
		LF82_RS01040 ←	methionine ABC transporter ATP‑binding protein MetN	S169R (AGC→CGC)		225.866	16.7
		LF82_RS01180 ←	type VI secretion system‑associated FHA domain protein TagH	N72H (AAC→CAC)		256,580	8.6
		LF82_RS01450 ←	fimbrial chaperone EcpE	S132R (AGC→CGC)		309.216	9.5
		LF82_RS25055 → / ← LF82_RS01865	DUF2754 domain‑containing protein/D‑alanine‑‑D‑alanine ligase A	intergenic (+17/+7)		403.369	8.5
		LF82_RS01900 →	shikimate kinase AroL	E61D (GAA→GAC)		410.134	8.8
		LF82_RS02100 ←	MFS transporter	E330* (GAA→TAA)		448,980	9.4
		LF82_RS02220 →	P‑II family nitrogen regulator	*113E (TAA→GAA)		476.247	5.9
		pagP →	phospholipid:lipid A palmitoyltransferase	F11L (TTC→TTA)		627.776	13.1
		LF82_RS03075 →	rhomboid family intramembrane serine protease	A448A (GCT→GCG)		652.403	10.6
		LF82_RS03085 ← / ← LF82_RS03090	magnesium/cobalt transporter CorC/rRNA maturation RNase YbeY	intergenic (‑53/+37)		655.558	11.1
		LF82_RS03270 →	alpha‑D‑glucose phosphate‑specific phosphoglucomutase	F211C (TTT→TGT)		686.721	8.1
		LF82_RS03445 →	cytochrome d ubiquinol oxidase subunit II	F292C (TTT→TGT)		726.952	12.1
		LF82_RS03780 →	ATP‑dependent RNA helicase RhlE	N94H (AAC→CAC)		784.685	8.2
		putA ←	trifunctional transcriptional regulator/proline dehydrogenase/L‑glutamate gamma‑semialdehyde dehydrogenase	G1102A (GGT→GCT)		1,055,769	7.8
		LF82_RS05755 ←	integrase	*381Y (TAG→TAT)		1,173,160	7.1
		LF82_RS06500 →	nitrate reductase subunit alpha	V514V (GTT→GTG)		1,291,038	10.3
		LF82_RS07585 →	formate dehydrogenase‑N subunit alpha	W420G (TGG→GGG)		1,514,491	8.1
		LF82_RS08730 ←	cysteine desulfuration protein SufE	N62T (AAT→ACT)		1,732,135	6.4
		LF82_RS09295 →	DUF441 domain‑containing protein	V26V (GTT→GTG)		1,843,956	9.3
		LF82_RS09760 ←	copper homeostasis protein CutC	L40W (TTG→TGG)		1,923,681	7.4
		LF82_RS11965 ←	NADH‑quinone oxidoreductase subunit NuoN	F186C (TTT→TGT)		2,399,560	15.0
		LF82_RS12000 ←	NADH‑quinone oxidoreductase subunit NuoG	F268V (TTC→GTC)		2,407,975	21.1
		LF82_RS12000 ←	NADH‑quinone oxidoreductase subunit NuoG	V172V (GTT→GTG)		2,408,261	13.6
		LF82_RS12015 ←	NADH‑quinone oxidoreductase subunit C/D	L416R (CTG→CGG)		2,411,210	12.8
		LF82_RS12025 ←	NADH‑quinone oxidoreductase subunit NuoA	A41A (GCA→GCC)		2,413,561	12.5
		LF82_RS12760 ←	ethanolamine utilization acetate kinase EutQ	A159A (GCT→GCG)		2,560,140	12.2
		LF82_RS13035 ←	alpha2‑macroglobulin	A1148A (GCT→GCG)		2,632,296	6.1
		LF82_RS13210 →	MurR/RpiR family transcriptional regulator	I89L (ATC→CTC)		2,676,716	7.7
		LF82_RS13890 →	proline/glycine betaine ABC transporter permease ProW	L151R (CTG→CGG)		2,789,383	9.5
		LF82_RS14180 →	DNA mismatch repair protein MutS	F155V (TTT→GTT)		2,841,482	6.1
		LF82_RS14830 ←	bifunctional acyl‑ACP‑‑phospholipid O‑acyltransferase/long‑chain‑fatty‑acid‑‑ACP ligase	V520V (GTT→GTG)		2,987,232	14.3
		LF82_RS14960 →	molybdopterin‑dependent oxidoreductase FAD‑binding subunit	K18T (AAG→ACG)		3,021,598	6.0
		LF82_RS15620 → / ← LF82_RS15625	aminotransferase class I/II‑fold pyridoxal phosphate‑dependent enzyme/LPS export ABC transporter permease LptG	intergenic (+14/+21)		3,161,235	11.4
		LF82_RS15745 →	NADP(+)‑dependent aldehyde reductase	E283D (GAA→GAC)		3,184,294	9.2
		LF82_RS15930 ←	ABC transporter ATP‑binding protein	N44H (AAC→CAC)		3,219,502	7.1
		LF82_RS16975 ←	rod shape‑determining protein MreC	F229V (TTC→GTC)		3,433,981	7.8
		LF82_RS17480 ←	bifunctional chitinase/lysozyme	F622C (TTT→TGT)		3,511,107	14.7
		LF82_RS17490 ←	elongation factor G	K653N (AAG→AAT)		3,514,674	9.4
		LF82_RS18665 ←	molybdopterin guanine dinucleotide‑containing S/N‑oxide reductase	E503D (GAA→GAC)		3,765,612	10.8
		LF82_RS18935 ←	serine O‑acetyltransferase	V164V (GTT→GTG)		3,827,561	10.1
		LF82_RS20630 ←	envelope stress sensor histidine kinase CpxA	L19R (CTG→CGG)		4,169,485	13.5
		LF82_RS20865 ←	AraC family transcriptional regulator	F195L (TTC→TTA)		4,219,653	9.8
		LF82_RS21290 ←	lysine‑sensitive aspartokinase 3	F140C (TTT→TGT)		4,313,296	6.1
		LF82_RS21605 →	glutamate/aspartate:proton symporter GltP	F362C (TTT→TGT)		4,384,233	13.0
		LF82_RS23000 → / → LF82_RS23005	chaperone protein FimC/fimbrial biogenesis outer membrane usher protein	intergenic (+55/‑11)		4,663,234	78.1
		LF82_RS23215 ←	restriction endonuclease EcoEI subunit M	F276C (TTT→TGT)		4,709,838	14.0
	TIVAP 4_port	LF82_RS23000 → / → LF82_RS23005	chaperone protein FimC/fimbrial biogenesis outer membrane usher protein	intergenic (+55/‑11)		4,663,234	84.5
		LF82_RS15280 →	methionine adenosyltransferase	F231V (TTC→GTC)		3,087,296	15.5
		LF82_RS19200 ←	PRD domain‑containing protein	D492Y (GAT→TAT)		3,879,852	13.7
		putA ←	trifunctional transcriptional regulator/proline dehydrogenase/L‑glutamate gamma‑semialdehyde dehydrogenase	G1102A (GGT→GCT)		1,055,769	8.7
		LF82_RS19155 →	xanthine/proton symporter XanP	Q12H (CAA→CAC)		3,871,152	8.5
		LF82_RS21610 ←	sel1 repeat family protein	M1I (ATG→ATT) †		4,386,089	8.1
		LF82_RS21610 ←	sel1 repeat family protein	M8L (ATG→TTG)		4,386,070	7.4
		LF82_RS17615 ←	peptidylprolyl isomerase A	S178T (TCA→ACA)		3,534,895	7.1
		LF82_RS02145 →	hypothetical protein	D52V (GAT→GTT)		458.178	6.5
		LF82_RS22360 → / → LF82_RS22365	tRNA‑Gly/tRNA‑Gly	intergenic (+36/‑1)		4,531,978	6.4
		LF82_RS08150 →	FRG domain‑containing protein	K104N (AAG→AAT)		1,620,218	5.5
		LF82_RS12965 →	exodeoxyribonuclease VII large subunit	H140Q (CAT→CAG)		2,606,445	5.4
	TIVAP 4_catheter	LF82_RS00475 →	UDP‑N‑acetylmuramate‑‑L‑alanine ligase	F328V (TTC→GTC)		102.954	12.3
		LF82_RS00545 ←	type II secretion system protein GspE	V454V (GTA→GTT)		116.826	10.2
		LF82_RS00670 ←	glucose/quinate/shikimate family membrane‑bound PQQ‑dependent dehydrogenase	F108C (TTT→TGT)		145.896	9.7
		LF82_RS01155 ←	type VI secretion system‑associated protein TagO	T42T (ACA→ACC)		249.872	10.8
		LF82_RS01615 ←	betaine‑aldehyde dehydrogenase	A65A (GCT→GCG)		348.473	6.7
		LF82_RS01760 →	DUF2058 domain‑containing protein	Q62H (CAA→CAC)		383.133	7.9
		LF82_RS02100 ←	MFS transporter	E330* (GAA→TAA)		448,980	8.7
		LF82_RS02150 →	trigger factor	Q64P (CAG→CCG)		458.624	14.4
		dpiB →	sensor histidine kinase DpiB	L128R (CTG→CGG)		623.806	8.5
		pagP →	phospholipid:lipid A palmitoyltransferase	F11L (TTC→TTA)		627.776	12.9
		tolA →	cell envelope integrity protein TolA	E39* (GAA→TAA)		729.492	11.6
		LF82_RS03570 ←	galactokinase	P26P (CCT→CCG)		742.397	15.2
		dinG →	ATP‑dependent DNA helicase DinG	I669I (ATC→ATA)		788,310	6.0
		LF82_RS04275 ←	cysteine/glutathione ABC transporter permease/ATP‑binding protein CydD	W78G (TGG→GGG)		892.918	11.3
		LF82_RS05390 ←	multidrug efflux MFS transporter MdtH	N9T (AAC→ACC)		1,101,961	6.0
		LF82_RS06135 ←	DUF1398 domain‑containing protein	Q8K (CAA→AAA)		1,223,834	13.3
		LF82_RS07280 ←	aldehyde dehydrogenase	F54V (TTC→GTC)		1,456,730	18.0
		LF82_RS07865 ←	PTS sugar transporter subunit IIB	L94I (CTT→ATT)		1,571,632	9.6
		LF82_RS07990 ←	phage tail tape measure protein	E448D (GAA→GAC)		1,597,704	6.2
		LF82_RS08270 →	Tat proofreading chaperone DmsD	V16G (GTG→GGG)		1,642,034	12.9
		LF82_RS08790 →	MFS transporter	V326V (GTT→GTG)		1,746,344	11.2
		LF82_RS09720 ←	aspartate‑‑tRNA ligase	E566D (GAA→GAC)		1,913,358	5.7
		LF82_RS10100 →	flagellar motor switch protein FliM	Q43P (CAA→CCA)		1,984,243	10.4
		LF82_RS11325 ←	HTH‑type transcriptional regulator GalS	L77R (CTG→CGG)		2,260,529	16.9
		LF82_RS11425 ←	fused PTS fructose transporter subunit IIA/HPr protein	F53V (TTC→GTC)		2,281,269	8.8
		LF82_RS12015 ←	NADH‑quinone oxidoreductase subunit C/D	L416R (CTG→CGG)		2,411,210	5.6
		LF82_RS12025 ←	NADH‑quinone oxidoreductase subunit NuoA	S95R (AGC→CGC)		2,413,401	5.9
		LF82_RS12365 ←	CoA:oxalate CoA‑transferase	L76I (CTT→ATT)		2,486,234	6.7
		LF82_RS12805 →	nitrate/nitrite two‑component system sensor histidine kinase NarQ	E530D (GAA→GAC)		2,572,915	8.8
		LF82_RS12945 →	glycine zipper 2TM domain‑containing protein	A80A (GCT→GCG)		2,601,824	6.2
		LF82_RS13125 ←	aldose 1‑epimerase	E224D (GAA→GAC)		2,651,826	7.6
		LF82_RS14840 ←	diaminopimelate decarboxylase	D197E (GAT→GAG)		2,991,087	10.9
		LF82_RS16120 →	L(+)‑tartrate dehydratase subunit beta	L152R (CTG→CGG)		3,258,604	9.4
		LF82_RS16135 →	30S ribosomal protein S21	F37L (TTC→TTA)		3,261,671	13.8
		LF82_RS16815 ←	aerobic respiration two‑component sensor histidine kinase ArcB	V475V (GTT→GTG)		3,395,279	8.1
		LF82_RS16975 ←	rod shape‑determining protein MreC	F229V (TTC→GTC)		3,433,981	9.8
		LF82_RS17855 ←	4‑alpha‑glucanotransferase	N524H (AAC→CAC)		3,585,161	15.7
		LF82_RS18000 ←	HTH‑type transcriptional regulator GntR	G161G (GGT→GGG)		3,624,274	6.4
		LF82_RS19475 →	tRNA uridine‑5‑carboxymethylaminomethyl(34) synthesis GTPase MnmE	L132I (CTT→ATT)		3,933,954	8.8
		LF82_RS19665 ←	ATPase RavA stimulator ViaA	V242G (GTG→GGG)		3,974,907	11.9
		LF82_RS20545 ←	formate dehydrogenase‑N subunit alpha	L184R (CTG→CGG)		4,153,670	5.2
		LF82_RS20735 ←	cell division protein FtsN	L44I (CTT→ATT)		4,187,811	20.3
		LF82_RS21135 →	sigma‑54‑dependent response regulator transcription factor ZraR	K223T (AAA→ACA)		4,279,977	6.4
		LF82_RS21295 →	glucose‑6‑phosphate isomerase	D68Y (GAT→TAT)		4,314,440	13.2
		LF82_RS21605 →	glutamate/aspartate:proton symporter GltP	F362C (TTT→TGT)		4,384,233	14.4
		LF82_RS22530 →	L‑ribulose‑5‑phosphate 3‑epimerase UlaE	A17A (GCT→GCG)		4,562,308	29.5
		LF82_RS23000 → / → LF82_RS23005	chaperone protein FimC/fimbrial biogenesis outer membrane usher protein	intergenic (+55/‑11)		4,663,234	65.4
	TIVAP 5_silicone septum	LF82_RS00030 ←	peroxide stress protein YaaA	I52N (ATC→AAC)		5.866	5.2
		LF82_RS00040 →	transaldolase	F178C (TTT→TGT)		8.331	5.7
		LF82_RS00140 →	ribonucleoside hydrolase RihC	F104C (TTT→TGT)		28.791	6.6
		LF82_RS00195 ←	crotonobetaine/carnitine‑CoA ligase	P333P (CCT→CCG)		38.428	15.2
		LF82_RS00195 ←	crotonobetaine/carnitine‑CoA ligase	F200V (TTC→GTC)		38.829	5.2
		thiP ←	thiamine/thiamine pyrophosphate ABC transporter permease ThiP	L217R (CTG→CGG)		76.304	8.9
		LF82_RS23665 ←	hypothetical protein	pseudogene (101/222 nt)		193.664	7.0
		LF82_RS01040 ←	methionine ABC transporter ATP‑binding protein MetN	S169R (AGC→CGC)		225.866	19.1
		LF82_RS01450 ←	fimbrial chaperone EcpE	S132R (AGC→CGC)		309.216	12.3
		LF82_RS01735 →	cytosine deaminase	F58C (TTT→TGT)		375.253	8.4
		LF82_RS01845 →	peptide antibiotic transporter SbmA	W27* (TGG→TAG)		400.265	76.2
		LF82_RS01845 →	peptide antibiotic transporter SbmA	Q120H (CAA→CAC)		400.545	7.3
		LF82_RS01875 →	alkaline phosphatase	L375R (CTG→CGG)		406.417	6.1
		LF82_RS01940 →	fructokinase	D258Y (GAC→TAC)		414.459	8.6
		LF82_RS02120 ←	cytochrome o ubiquinol oxidase subunit I	L483V (TTG→GTG)		452.496	11.8
		LF82_RS02685 →	Cu(+)/Ag(+) efflux RND transporter permease subunit CusA	L210R (CTG→CGG)		572.925	13.4
		entF →	enterobactin non‑ribosomal peptide synthetase EntF	L426R (CTG→CGG)		588.261	7.1
		LF82_RS02885 ←	ribonuclease I	E130D (GAA→GAC)		615.804	24.0
		LF82_RS02965 ← / ← LF82_RS23835	lipoyl synthase/hypothetical protein	intergenic (‑78/+21)		631.481	6.4
		LF82_RS03065 ←	glutamate/aspartate ABC transporter permease GltJ	L86R (CTG→CGG)		649.272	10.5
		LF82_RS03080 ←	apolipoprotein N‑acyltransferase	L491R (CTG→CGG)		653.131	9.5
		LF82_RS03415 →	2‑oxoglutarate dehydrogenase complex dihydrolipoyllysine‑residue succinyltransferase	Q168H (CAA→CAC)		718.799	7.1
		LF82_RS03930 ←	molybdopterin‑synthase adenylyltransferase MoeB	L149R (CTG→CGG)		816,490	5.3
		LF82_RS04770 ←	DUF551 domain‑containing protein	Q162H (CAA→CAC)		1,001,692	9.0
		LF82_RS06275 ←	Na(+)/H(+) antiporter NhaB	F392L (TTC→TTA)		1,241,798	9.2
		LF82_RS06725 ←	anthranilate synthase component I	F270V (TTC→GTC)		1,337,021	6.0
		LF82_RS07335 →	dicarboxylate transporter/tellurite‑resistance protein TehA	I95S (ATT→AGT)		1,465,399	14.9
		LF82_RS07515 →	hypothetical protein	F19L (TTC→TTA)		1,498,822	10.5
		LF82_RS07865 ←	PTS sugar transporter subunit IIB	L94I (CTT→ATT)		1,571,632	11.7
		LF82_RS08270 →	Tat proofreading chaperone DmsD	V16G (GTG→GGG)		1,642,034	14.6
		LF82_RS09525 ←	carboxy terminal‑processing peptidase	F112L (TTC→TTA)		1,879,158	8.8
		LF82_RS09640 ←	phosphogluconate dehydratase	F168C (TTT→TGT)		1,898,777	9.2
		LF82_RS09775 ←	flagellar protein FlhE	Q15H (CAA→CAC)		1,926,729	5.1
		LF82_RS10100 →	flagellar motor switch protein FliM	Q43P (CAA→CCA)		1,984,243	19.6
		LF82_RS10540 ←	regulatory protein PocR	E160* (GAA→TAA)		2,084,807	17.9
		LF82_RS10860 ←	colanic acid biosynthesis glycosyltransferase WcaC	K180T (AAA→ACA)		2,147,769	8.7
		LF82_RS11325 ←	HTH‑type transcriptional regulator GalS	L77R (CTG→CGG)		2,260,529	20.1
		LF82_RS11355 ←	catecholate siderophore receptor CirA	S218T (TCA→ACA)		2,265,208	11.2
		LF82_RS11990 ←	NADH‑quinone oxidoreductase subunit NuoI	M122R (ATG→AGG)		2,404,697	18.1
		LF82_RS12000 ←	NADH‑quinone oxidoreductase subunit NuoG	F268V (TTC→GTC)		2,407,975	16.8
		LF82_RS12005 ←	NADH‑quinone oxidoreductase subunit NuoF	W353G (TGG→GGG)		2,409,110	11.3
		LF82_RS12005 ←	NADH‑quinone oxidoreductase subunit NuoF	L112R (CTG→CGG)		2,409,832	6.5
		LF82_RS12015 ←	NADH‑quinone oxidoreductase subunit C/D	L416R (CTG→CGG)		2,411,210	5.3
		LF82_RS12025 ←	NADH‑quinone oxidoreductase subunit NuoA	S95R (AGC→CGC)		2,413,401	9.8
		LF82_RS12200 ←	MFS transporter	L357R (CTT→CGT)		2,447,934	7.4
		LF82_RS12375 ←	oxalyl‑CoA decarboxylase	A488A (GCT→GCG)		2,487,778	13.9
		LF82_RS13085 ←	IscS subfamily cysteine desulfurase	L342R (CTG→CGG)		2,643,516	15.5
		LF82_RS14360 →	MFS transporter	F61L (TTC→TTA)		2,877,325	5.7
		LF82_RS14535 → / ← LF82_RS14540	L‑fucose operon activator/23S rRNA (cytidine(2498)‑2'‑O)‑methyltransferase RlmM	intergenic (+14/+30)		2,918,368	7.1
		LF82_RS15135 →	LysR family transcriptional regulator ArgP	K2T (AAA→ACA)		3,059,740	7.8
		LF82_RS15440 →	capsular polysaccharide biosynthesis protein	D487Y (GAC→TAC)		3,117,552	9.7
		LF82_RS15865 ← / ← LF82_RS15870	AraC family transcriptional regulator/OB fold stress tolerance protein YgiW	intergenic (‑30/+23)		3,209,575	7.6
		LF82_RS16285 →	DedA family protein	Q70H (CAA→CAC)		3,298,161	7.4
		LF82_RS16815 ←	aerobic respiration two‑component sensor histidine kinase ArcB	V475V (GTT→GTG)		3,395,279	9.8
		LF82_RS16915 → / → LF82_RS16920	transcriptional regulator ArgR/peroxide/acid stress response protein YhcN	intergenic (+16/‑348)		3,420,158	6.8
		LF82_RS16975 ←	rod shape‑determining protein MreC	F229V (TTC→GTC)		3,433,981	11.3
		LF82_RS17650 ←	aminotransferase class I/II‑fold pyridoxal phosphate‑dependent enzyme	L318L (CTC→CTA)		3,542,989	13.2
		LF82_RS17760 →	intracellular growth attenuator protein IgaA	W267G (TGG→GGG)		3,565,061	7.1
		LF82_RS17855 ←	4‑alpha‑glucanotransferase	G370G (GGC→GGA)		3,585,621	10.9
		LF82_RS18190 →	4'‑phosphopantetheinyl transferase AcpT	E64D (GAA→GAC)		3,658,433	6.3
		LF82_RS18630 ←	outer membrane usher protein LpfC	L83R (CTG→CGG)		3,759,642	9.6
		LF82_RS18855 ←	selenocysteinyl‑tRNA‑specific translation elongation factor SelB	L501R (CTG→CGG)		3,805,757	11.6
		LF82_RS19010 ←	glycosyltransferase family 2 protein	R219I (AGA→ATA)		3,842,924	12.8
		LF82_RS19395 ←	galactonate dehydratase	F339L (TTC→TTA)		3,918,716	9.5
		LF82_RS19570 ←	phosphate ABC transporter permease PstA	I134S (ATT→AGT)		3,955,068	12.0
		LF82_RS19610 ←	F0F1 ATP synthase subunit alpha	D46E (GAT→GAG)		3,965,748	13.6
		LF82_RS20455 →	aldolase	D268Y (GAT→TAT)		4,137,445	10.1
		LF82_RS20630 ←	envelope stress sensor histidine kinase CpxA	L19R (CTG→CGG)		4,169,485	6.4
		LF82_RS20735 ←	cell division protein FtsN	L44I (CTT→ATT)		4,187,811	16.6
		LF82_RS21105 →	deoxyribonuclease V	L149R (CTG→CGG)		4,275,252	20.8
		LF82_RS22530 →	L‑ribulose‑5‑phosphate 3‑epimerase UlaE	A17A (GCT→GCG)		4,562,308	37.4
		fimA →	type‑1 fimbrial protein, A chain	Q69K (CAG→AAG)		4,661,463	77.6
		LF82_RS23215 ←	restriction endonuclease EcoEI subunit M	F276C (TTT→TGT)		4,709,838	12.8
	TIVAP 5_port	fimA →	type‑1 fimbrial protein A chain	Q69K (CAG→AAG)		4,661,463	64.5
		LF82_RS01845 →	peptide antibiotic transporter SbmA	W27* (TGG→TAG)		400.265	61.0
		LF82_RS23830 ← / → pagP	hypothetical protein/phospholipid:lipid A palmitoyltransferase	intergenic (‑214/‑270)		627.474	13.5
		LF82_RS19155 →	xanthine/proton symporter XanP	Q12H (CAA→CAC)		3,871,152	11.1
		LF82_RS24435 ←	alpha‑ketoglutarate permease	pseudogene (35/112 nt)		2,703,321	10.7
		LF82_RS24435 ←	alpha‑ketoglutarate permease	pseudogene (3/112 nt)		2,703,353	10.4
		LF82_RS03545 ←	hypothetical protein	Q108K (CAA→AAA)		737.482	9.4
		LF82_RS02450 ← / ← LF82_RS02455	chaperedoxin/NADP(+)‑dependent aldehyde reductase	intergenic (‑55/+6)		523.984	8.7
		LF82_RS23830 ← / → pagP	hypothetical protein/phospholipid:lipid A palmitoyltransferase	intergenic (‑209/‑275)		627.469	7.6
		LF82_RS12505 → / ← LF82_RS12510	putative DNA‑binding transcriptional regulator/glutamate‑‑tRNA ligase	intergenic (+44/+7)		2,515,188	6.9
		LF82_RS13190 ←	phosphoribosylformylglycinamidine synthase	H153Q (CAT→CAA)		2,672,778	6.1
		LF82_RS14060 ←	carbamoyltransferase HypF	L512F (TTA→TTC)		2,818,626	5.8
		LF82_RS01220 → / → LF82_RS01225	type VI secretion system tip protein VgrG/hypothetical protein	intergenic (+75/‑4)		265.864	5.0
	TIVAP 5_catheter	LF82_RS00120 →	isoleucine‑‑tRNA ligase	F661V (TTC→GTC)		25.576	9.5
		LF82_RS00140 →	ribonucleoside hydrolase RihC	F104C (TTT→TGT)		28.791	10.6
		LF82_RS00285 ←	peptidylprolyl isomerase SurA	N168H (AAC→CAC)		56.365	13.6
		LF82_RS00405 →	acetolactate synthase 3 large subunit	V210V (GTT→GTG)		87.467	5.8
		LF82_RS01040 ←	methionine ABC transporter ATP‑binding protein MetN	S169R (AGC→CGC)		225.866	20.5
		LF82_RS01180 ←	type VI secretion system‑associated FHA domain protein TagH	N72H (AAC→CAC)		256.58	8.3
		LF82_RS01845 →	peptide antibiotic transporter SbmA	coding (12/1221 nt)		400.197	100
		LF82_RS01845 →	peptide antibiotic transporter SbmA	W27* (TGG→TAG)		400.265	38.2
		LF82_RS02120 ←	cytochrome o ubiquinol oxidase subunit I	K55T (AAA→ACA)		453.779	16.7
		dpiB →	sensor histidine kinase DpiB	L128R (CTG→CGG)		623.806	6.3
		pagP →	phospholipid:lipid A palmitoyltransferase	F11L (TTC→TTA)		627.776	6.1
		LF82_RS04275 ←	cysteine/glutathione ABC transporter permease/ATP‑binding protein CydD	W78G (TGG→GGG)		892.918	9.5
		LF82_RS06170 →	EAL domain‑containing protein	F258L (TTC→TTA)		1,228,860	15.7
		LF82_RS06275 ←	Na(+)/H(+) antiporter NhaB	F392L (TTC→TTA)		1,241,798	9.5
		LF82_RS07585 →	formate dehydrogenase‑N subunit alpha	W420G (TGG→GGG)		1,514,491	9.6
		LF82_RS08270 →	Tat proofreading chaperone DmsD	V16G (GTG→GGG)		1,642,034	20.0
		LF82_RS08475 →	electron transport complex subunit RsxD	L306R (CTG→CGG)		1,687,475	9.9
		LF82_RS09780 ←	flagellar biosynthesis protein FlhA	K339T (AAA→ACA)		1,927,836	8.5
		LF82_RS10100 →	flagellar motor switch protein FliM	Q43P (CAA→CCA)		1,984,243	11.2
		LF82_RS11325 ←	HTH‑type transcriptional regulator GalS	L77R (CTG→CGG)		2,260,529	16.4
		LF82_RS11970 ←	NADH‑quinone oxidoreductase subunit M	T401P (ACC→CCC)		2,400,452	8.9
		LF82_RS12015 ←	NADH‑quinone oxidoreductase subunit C/D	F95L (TTC→TTA)		2,412,172	11.9
		LF82_RS12025 ←	NADH‑quinone oxidoreductase subunit NuoA	A41A (GCA→GCC)		2,413,561	20.4
		LF82_RS12740 ←	ethanolamine utilization microcompartment protein EutN	T51P (ACC→CCC)		2,557,513	7.9
		LF82_RS12970 ←	hypothetical protein	V2569V (GTA→GTT)		2,607,816	10.4
		LF82_RS13085 ←	IscS subfamily cysteine desulfurase	L342R (CTG→CGG)		2,643,516	14.1
		LF82_RS14730 →	amino‑acid N‑acetyltransferase	C265G (TGT→GGT)		2,962,777	12.1
		LF82_RS15880 →	two‑component system sensor histidine kinase QseC	H231Q (CAT→CAA)		3,211,490	17.0
		LF82_RS16115 →	L(+)‑tartrate dehydratase subunit alpha	E204D (GAA→GAC)		3,257,853	8.8
		LF82_RS16285 →	DedA family protein	Q70H (CAA→CAC)		3,298,161	9.0
		LF82_RS16815 ←	aerobic respiration two‑component sensor histidine kinase ArcB	V475V (GTT→GTG)		3,395,279	11.3
		LF82_RS16975 ←	rod shape‑determining protein MreC	F229V (TTC→GTC)		3,433,981	9.2
		LF82_RS17490 ←	elongation factor G	K653N (AAG→AAT)		3,514,674	11.2
		LF82_RS17855 ←	4‑alpha‑glucanotransferase	N524H (AAC→CAC)		3,585,161	14.6
		LF82_RS18665 ←	molybdopterin guanine dinucleotide‑containing S/N‑oxide reductase	E503D (GAA→GAC)		3,765,612	14.0
		LF82_RS19610 ←	F0F1 ATP synthase subunit alpha	D46E (GAT→GAG)		3,965,748	16.3
		LF82_RS19665 ←	ATPase RavA stimulator ViaA	V242G (GTG→GGG)		3,974,907	7.7
		ubiB →	ubiquinone biosynthesis regulatory protein kinase UbiB	M241L (ATG→TTG)		4,089,191	9.0
		ubiB →	ubiquinone biosynthesis regulatory protein kinase UbiB	D253V (GAT→GTT)		4,089,228	7.2
		LF82_RS20630 ←	envelope stress sensor histidine kinase CpxA	L19R (CTG→CGG)		4,169,485	7.5
		LF82_RS21230 →	Na/Pi cotransporter family protein	F256C (TTT→TGT)		4,302,880	7.5
		LF82_RS21605 →	glutamate/aspartate:proton symporter GltP	F362C (TTT→TGT)		4,384,233	17.4
		LF82_RS22530 →	L‑ribulose‑5‑phosphate 3‑epimerase UlaE	A17A (GCT→GCG)		4,562,308	20.6
		LF82_RS22690 →	autotransporter assembly complex protein TamB	S30R (AGC→CGC)		4,591,438	14.5
		fimA →	type‑1 fimbrial protein, A chain	Q69K (CAG→AAG)		4,661,463	37.3
		LF82_RS23020 →	type 1 fimbriae D‑mannose specific adhesin FimH	L128R (CTT→CGT)		4,667,339	16.1
		LF82_RS23395 →	metal‑dependent hydrolase	Q30H (CAA→CAC)		4,744,543	6.6
	TIVAP 6_silicone septum	LF82_RS00310 ←	DNA polymerase II	N735H (AAC→CAC)		64.352	6.2
		LF82_RS00800 →	ferrichrome porin FhuA	pseudogene (689/2244 nt)		173.077	10.6
		LF82_RS00950 →	lipid‑A‑disaccharide synthase	S17T (TCC→ACC)		207.168	19.9
		LF82_RS01180 ←	type VI secretion system‑associated FHA domain protein TagH	N72H (AAC→CAC)		256,580	8.9
		LF82_RS01450 ←	fimbrial chaperone EcpE	S132R (AGC→CGC)		309.216	15.4
		LF82_RS01845 →	peptide antibiotic transporter SbmA	A41A (GCT→GCG)		400.308	8.4
		LF82_RS01845 →	peptide antibiotic transporter SbmA	C67* (TGC→TGA)		400.386	25.4
		LF82_RS02100 ←	MFS transporter	E330* (GAA→TAA)		448,980	14.6
		LF82_RS02180 →	hypothetical protein	L24R (CTG→CGG)		467.308	6.9
		LF82_RS02470 →	ABC transporter permease	V388G (GTG→GGG)		527.228	12.0
		pagP →	phospholipid:lipid A palmitoyltransferase	F11L (TTC→TTA)		627.776	12.1
		LF82_RS05665 →	NAD‑dependent protein deacylase	A223A (GCT→GCG)		1,156,860	11.0
		LF82_RS06615 →	oligopeptide ABC transporter substrate‑binding protein OppA	L25R (CTG→CGG)		1,316,138	13.7
		LF82_RS08725 ←	L,D‑transpeptidase LdtE	E135D (GAA→GAC)		1,731,350	6.2
		LF82_RS09525 ←	carboxy terminal‑processing peptidase	F112L (TTC→TTA)		1,879,158	11.8
		LF82_RS10100 →	flagellar motor switch protein FliM	Q43P (CAA→CCA)		1,984,243	17.3
		LF82_RS24260 ←	hypothetical protein	P39P (CCT→CCG)		1,988,912	8.6
		LF82_RS10175 ←	DNA cytosine methyltransferase	M411R (ATG→AGG)		1,995,114	7.2
		LF82_RS10715 →	imidazole glycerol phosphate synthase subunit HisH	Q51H (CAA→CAC)		2,115,648	9.0
		LF82_RS11255 ←	SDR family oxidoreductase	P183P (CCT→CCG)		2,245,793	6.5
		LF82_RS11325 ←	HTH‑type transcriptional regulator GalS	L77R (CTG→CGG)		2,260,529	12.2
		LF82_RS11425 ←	fused PTS fructose transporter subunit IIA/HPr protein	L248I (CTT→ATT)		2,280,684	9.6
		LF82_RS12080 →	putative basic amino acid antiporter YfcC	V330V (GTT→GTG)		2,426,680	7.6
		LF82_RS12435 ←	aminopeptidase	N118T (AAT→ACT)		2,502,485	6.6
		eutA ←	ethanolamine ammonia‑lyase reactivating factor EutA	L114R (CTG→CGG)		2,552,204	15.0
		LF82_RS12990 ←	ribosome biogenesis GTPase Der	I419S (ATT→AGT)		2,619,556	8.9
		LF82_RS13085 ←	IscS subfamily cysteine desulfurase	L342R (CTG→CGG)		2,643,516	12.3
		LF82_RS15545 ←	hypothetical protein	S62C (AGT→TGT)		3,139,905	13.7
		LF82_RS16020 →	fimbrial biogenesis outer membrane usher protein	P773P (CCT→CCA)		3,239,461	10.6
		LF82_RS16135 →	30S ribosomal protein S21	F37L (TTC→TTA)		3,261,671	20.4
		LF82_RS16170 ←	hypothetical protein	pseudogene (197/1521 nt)		3,269,659	9.2
		LF82_RS16575 ←	DEAD/DEAH family ATP‑dependent RNA helicase	F201V (TTT→GTT)		3,351,080	12.5
		LF82_RS16980 ←	rod shape‑determining protein	V316V (GTT→GTG)		3,434,827	11.7
		LF82_RS17305 ←	30S ribosomal protein S5	V46G (GTT→GGT)		3,488,202	9.2
		LF82_RS18665 ←	molybdopterin guanine dinucleotide‑containing S/N‑oxide reductase	E503D (GAA→GAC)		3,765,612	11.6
		LF82_RS19010 ←	glycosyltransferase family 2 protein	R219I (AGA→ATA)		3,842,924	9.9
		atpC ←	F0F1 ATP synthase subunit epsilon	L129R (CTG→CGG)		3,961,615	13.3
		ubiB →	ubiquinone biosynthesis regulatory protein kinase UbiB	L446R (CTG→CGG)		4,089,807	11.2
		LF82_RS20555 →	sulfurtransferase FdhD	F105V (TTT→GTT)		4,154,726	11.6
		LF82_RS20630 ←	envelope stress sensor histidine kinase CpxA	M22L (ATG→TTG)		4,169,477	7.3
		LF82_RS20840 →	PTS fructose transporter subunit EIIC	A220A (GCT→GCG)		4,215,109	6.6
		LF82_RS21550 →	LrgB family protein	L151R (CTG→CGG)		4,371,644	10.0
		LF82_RS21605 →	glutamate/aspartate:proton symporter GltP	F362C (TTT→TGT)		4,384,233	18.4
		LF82_RS21860 ←	DUF2238 domain‑containing protein	F134C (TTT→TGT)		4,437,324	12.0
		LF82_RS22730 ←	class 1 fructose‑bisphosphatase	F311L (TTC→TTA)		4,603,065	16.9
		LF82_RS22745 →	metalloprotease PmbA	V132V (GTT→GTG)		4,606,744	7.3
		fimA →	type‑1 fimbrial protein, A chain	Q69K (CAG→AAG)		4,661,463	38.0
		LF82_RS23175 ←	hypothetical protein	I206S (ATT→AGT)		4,700,103	9.5
		LF82_RS23215 ←	restriction endonuclease EcoEI subunit M	F276C (TTT→TGT)		4,709,838	10.8
		LF82_RS23400 ←	YjjW family glycine radical enzyme activase	F129C (TTT→TGT)		4,745,928	13.3
	TIVAP 6_port	fimA →	type‑1 fimbrial protein A chain	Q69K (CAG→AAG)		4,661,463	35.0
		LF82_RS15280 →	methionine adenosyltransferase	F231V (TTC→GTC)		3,087,296	18.0
		LF82_RS01845 →	peptide antibiotic transporter SbmA	C67* (TGC→TGA)		400.386	16.1
		LF82_RS21635 ← / ← LF82_RS21640	ABC transporter substrate‑binding protein/formate dehydrogenase H subunit alpha selenocysteine‑containing	intergenic (‑310/+61)		4,391,582	15.4
		LF82_RS16370 ←	propionate kinase	A56A (GCT→GCA)		3,313,051	14.1
		LF82_RS01100 ←	murein transglycosylase D	N74H (AAC→CAC)		237.671	13.1
		LF82_RS14435 →	two‑component sensor histidine kinase BarA	E91* (GAA→TAA)		2,893,537	12.2
		LF82_RS19155 →	xanthine/proton symporter XanP	Q12H (CAA→CAC)		3,871,152	11.5
		LF82_RS14775 ←	thymidylate synthase	N19H (AAC→CAC)		2,977,878	10.9
		livM ←	high‑affinity branched‑chain amino acid ABC transporter permease LivM	A154S (GCG→TCG)		3,640,132	10.3
		LF82_RS01945 ←	MFS transporter AraJ	L293R (CTT→CGT)		415.172	10.0
		LF82_RS08875 ←	YdiU family protein	F260C (TTT→TGT)		1,763,323	9.7
		LF82_RS01410 ←	vacuolating autotransporter toxin Vat	I487I (ATA→ATC)		303,830	9.5
		LF82_RS12680 →	N‑acetylmuramoyl‑L‑alanine amidase AmiA	K47T (AAG→ACG)		2,544,941	8.3
		LF82_RS03220 → / → chiP	glutamine‑‑tRNA ligase/chitoporin	intergenic (+88/‑354)		680.512	7.9
		LF82_RS18765 →	alpha‑amylase	coding (1734/2031 nt)		3,788,472	7.8
		LF82_RS03410 →	2‑oxoglutarate dehydrogenase E1 component	A602A (GCC→GCT)		717.285	7.6
		LF82_RS10275 ←	yersiniabactin ABC transporter ATP‑binding/permease protein YbtQ	L199R (CTG→CGG)		2,013,178	7.6
		LF82_RS21610 ←	sel1 repeat family protein	M1I (ATG→ATT) †		4,386,089	7.3
		livM ←	high‑affinity branched‑chain amino acid ABC transporter permease LivM	T152T (ACT→ACA)		3,640,136	7.2
		LF82_RS03725 → / → LF82_RS03730	Bax inhibitor‑1/YccA family protein/Bax inhibitor‑1/YccA family protein	intergenic (+51/‑154)		774.173	7.0
		LF82_RS06275 ←	Na(+)/H(+) antiporter NhaB	G163C (GGT→TGT)		1,242,487	6.9
		LF82_RS14390 →	YgcG family protein	S232I (AGT→ATT)		2,883,460	6.8
		LF82_RS19195 ← / ← LF82_RS19200	PTS fructose transporter subunit IIA/PRD domain‑containing protein	intergenic (‑11/+16)		3,879,756	6.7
		LF82_RS21970 →	helix‑turn‑helix domain‑containing protein	L51V (TTA→GTA)		4,460,028	6.7
		LF82_RS23175 ←	hypothetical protein	F129V (TTC→GTC)		4,700,335	6.7
		LF82_RS01730 →	cytosine permease	R404R (CGT→CGA)		375.043	6.6
		LF82_RS18165 ← / → LF82_RS18170	sulfurtransferase TusA/7‑cyano‑7‑deazaguanine/7‑aminomethyl‑7‑ deazaguanine transporter	intergenic (‑11/‑210)		3,654,280	6.6
		motB ←	motility protein MotB	R222C (CGC→TGC)		1,938,025	6.1
		LF82_RS04390 →	ComEC family protein	F164V (TTT→GTT)		923.816	5.8
		LF82_RS16700 → / → LF82_RS16705	octaprenyl diphosphate synthase/DNA‑binding transcriptional regulator SfsB	intergenic (+22/‑212)		3,378,376	5.5
		LF82_RS21220 →	hypothetical protein	S75I (AGT→ATT)		4,301,354	5.3
	TIVAP 6_catheter	LF82_RS00290 ←	LPS assembly protein LptD	F313L (TTC→TTA)		58.335	7.2
		LF82_RS00400 →	transcriptional regulator LeuO	R261R (CGT→CGG)		86.358	6.2
		LF82_RS00475 →	UDP‑N‑acetylmuramate‑‑L‑alanine ligase	F328V (TTC→GTC)		102.954	8.9
		LF82_RS01015 ←	proline‑‑tRNA ligase	Q503H (CAA→CAC)		220.993	6.7
		LF82_RS01040 ←	methionine ABC transporter ATP‑binding protein MetN	S169R (AGC→CGC)		225.866	21.9
		LF82_RS01180 ←	type VI secretion system‑associated FHA domain protein TagH	N72H (AAC→CAC)		256,580	11.5
		LF82_RS01450 ←	fimbrial chaperone EcpE	S132R (AGC→CGC)		309.216	8.7
		LF82_RS01460 ←	fimbrial biogenesis outer membrane usher protein	N779H (AAC→CAC)		311.402	10.5
		LF82_RS01735 →	cytosine deaminase	F58C (TTT→TGT)		375.253	17.0
		LF82_RS01845 →	peptide antibiotic transporter SbmA	C67* (TGC→TGA)		400.386	34.6
		LF82_RS02125 ←	cytochrome o ubiquinol oxidase subunit II	S211R (AGC→CGC)		454.281	6.1
		LF82_RS02180 →	hypothetical protein	L24R (CTG→CGG)		467.308	9.1
		LF82_RS03015 ← / ← LF82_RS03020	ribosome silencing factor/adenosylcobalamin/alpha‑ribazole phosphatase	intergenic (‑65/+195)		639.892	11.7
		LF82_RS03270 →	alpha‑D‑glucose phosphate‑specific phosphoglucomutase	F211C (TTT→TGT)		686.721	7.9
		tolA →	cell envelope integrity protein TolA	K309N (AAA→AAC)		730.304	10.9
		LF82_RS03570 ←	galactokinase	P26P (CCT→CCG)		742.397	10.0
		LF82_RS04700 →	cytochrome d ubiquinol oxidase subunit II	L102R (CTG→CGG)		991.403	8.6
		LF82_RS04770 ←	DUF551 domain‑containing protein	Q162H (CAA→CAC)		1,001,692	15.4
		LF82_RS05170 →	deferrochelatase/peroxidase EfeB	N165H (AAC→CAC)		1,063,737	11.6
		flgL →	flagellar hook‑filament junction protein FlgL	L260R (CTG→CGG)		1,117,469	6.5
		LF82_RS06170 →	EAL domain‑containing protein	F258L (TTC→TTA)		1,228,860	8.1
		LF82_RS06570 ← / → LF82_RS06575	YchJ family protein/patatin‑like phospholipase RssA	intergenic (‑23/‑90)		1,305,082	5.8
		mdoD →	glucan biosynthesis protein D	K358T (AAA→ACA)		1,462,471	6.1
		LF82_RS07335 →	dicarboxylate transporter/tellurite‑resistance protein TehA	I95S (ATT→AGT)		1,465,399	9.7
		LF82_RS07505 →	type VI secretion system tip protein VgrG	K623T (AAG→ACG)		1,497,423	15.1
		LF82_RS08250 →	dimethyl sulfoxide reductase subunit A	N383H (AAC→CAC)		1,636,745	8.5
		LF82_RS09255 ←	methylglyoxal reductase YeaE	Q235L (CAG→CTG)		1,834,460	10.8
		LF82_RS09750 ←	molybdopterin guanine dinucleotide‑containing S/N‑oxide reductase	V487V (GTT→GTG)		1,920,080	10.7
		LF82_RS10540 ←	regulatory protein PocR	E160* (GAA→TAA)		2,084,807	13.2
		LF82_RS10640 →	EutP/PduV family microcompartment system protein	N89T (AAT→ACT)		2,101,162	7.2
		LF82_RS10805 ←	M‑antigen undecaprenyl disphosphate flippase	F460C (TTT→TGT)		2,134,937	14.7
		LF82_RS10955 →	MFS transporter	L33R (CTT→CGT)		2,176,851	9.0
		LF82_RS11325 ←	HTH‑type transcriptional regulator GalS	L77R (CTG→CGG)		2,260,529	17.3
		LF82_RS11620 ←	periplasmic nitrate reductase subunit alpha	A17A (GCT→GCG)		2,317,606	7.0
		LF82_RS11850 ←	membrane protein	H54Q (CAT→CAA)		2,378,248	9.5
		LF82_RS12000 ←	NADH‑quinone oxidoreductase subunit NuoG	F268V (TTC→GTC)		2,407,975	17.4
		LF82_RS12005 ←	NADH‑quinone oxidoreductase subunit NuoF	W353G (TGG→GGG)		2,409,110	10.1
		LF82_RS12025 ←	NADH‑quinone oxidoreductase subunit NuoA	A41A (GCA→GCC)		2,413,561	9.6
		LF82_RS12200 ←	MFS transporter	L357R (CTT→CGT)		2,447,934	8.7
		LF82_RS12410 ←	alanine transaminase	K304T (AAA→ACA)		2,494,671	7.6
		LF82_RS15955 ←	DUF1249 family protein	E51D (GAA→GAC)		3,225,834	11.7
		LF82_RS16125 →	anion permease	L413R (CTG→CGG)		3,260,041	7.7
		LF82_RS17760 →	intracellular growth attenuator protein IgaA	W267G (TGG→GGG)		3,565,061	16.2
		treF →	alpha,alpha‑trehalase TreF	F169V (TTT→GTT)		3,715,461	6.5
		LF82_RS18665 ←	molybdopterin guanine dinucleotide‑containing S/N‑oxide reductase	E503D (GAA→GAC)		3,765,612	13.7
		LF82_RS18875 ←	DUF3302 domain‑containing protein	W75G (TGG→GGG)		3,810,702	9.4
		LF82_RS19010 ←	glycosyltransferase family 2 protein	R219I (AGA→ATA)		3,842,924	13.0
		LF82_RS19205 ←	alpha‑xylosidase	N581H (AAC→CAC)		3,882,198	6.8
		LF82_RS19570 ←	phosphate ABC transporter permease PstA	I134S (ATT→AGT)		3,955,068	10.4
		atpC ←	F0F1 ATP synthase subunit epsilon	L129R (CTG→CGG)		3,961,615	13.2
		LF82_RS19610 ←	F0F1 ATP synthase subunit alpha	D46E (GAT→GAG)		3,965,748	11.6
		LF82_RS19665 ←	ATPase RavA stimulator ViaA	W132G (TGG→GGG)		3,975,238	9.0
		LF82_RS19695 →	ribose ABC transporter substrate‑binding protein RbsB	L223R (CTG→CGG)		3,982,973	9.6
		LF82_RS20545 ←	formate dehydrogenase‑N subunit alpha	L184R (CTG→CGG)		4,153,670	9.3
		LF82_RS20715 ←	ribonuclease E activity regulator RraA	D156Y (GAT→TAT)		4,183,466	13.9
		LF82_RS20865 ←	AraC family transcriptional regulator	F195L (TTC→TTA)		4,219,653	8.3
		LF82_RS21245 ←	L‑sorbose 1‑phosphate reductase	Q176H (CAA→CAC)		4,305,608	8.7
		LF82_RS21605 →	glutamate/aspartate:proton symporter GltP	F362C (TTT→TGT)		4,384,233	10.8
		LF82_RS22750 →	cytochrome b562	L32H (CTC→CAC)		4,607,979	12.6
		fimA →	type‑1 fimbrial protein, A chain	Q69K (CAG→AAG)		4,661,463	47.3
Experiment	Sample (TIVAP)	Locus name	Annotation	Mutations	NODE	Genomic position	Frequency(%)
55989 in vitro LB experiment
	TIVAP 4_silicone septum	fusA ←	elongation factor G	F605L (TTT→CTT)	NODE_7_length_189571	660	100
		aspC → / –	aspartate transaminase/–	intergenic (+57/–)	NODE_30_length_50383	50.303	10.9
			phoA_2–KOPPCICB_04476	∆11024 nt	NODE_46_length_22207	1–11,024	100
	TIVAP 4_port	yqeC →	selenium cofactor biosynthesis protein YqeC	E135E (GAG→GAA)	NODE_5_length_210475	27.762	9.1
		wcaK ← / ← wzxC	colanic acid biosynthesis pyruvyl transferase WcaK/colanic acid undecaprenyl disphosphate flippase WzxC	intergenic (‑122/+126)	NODE_6_length_201492	123.903	19.5
		wcaK ← / ← wzxC	colanic acid biosynthesis pyruvyl transferase WcaK/colanic acid undecaprenyl disphosphate flippase WzxC	intergenic (‑149/+111)	NODE_6_length_201492	123,930	39.0
		fusA ←	elongation factor G	F605L (TTT→CTT)	NODE_7_length_189571	660	100
		aspC → / –	aspartate transaminase/–	intergenic (+57/–)	NODE_30_length_50383	50.303	10.9
			phoA_2–KOPPCICB_04476	∆11024 nt	NODE_46_length_22207	1–11,024	100
	TIVAP 4_catheter	yqeC →	selenium cofactor biosynthesis protein YqeC	E135E (GAG→GAA)	NODE_5_length_210475	27.762	9.1
		wcaK ← / ← wzxC	colanic acid biosynthesis pyruvyl transferase WcaK/colanic acid undecaprenyl disphosphate flippase WzxC	intergenic (‑149/+111)	NODE_6_length_201492	123,930	30.4
		fusA ←	elongation factor G	F605L (TTT→CTT)	NODE_7_length_189571	660	91.5
		KOPPCICB_01901 ← / –	hypothetical protein/–	intergenic (‑663/–)	NODE_9_length_182868	182.858	46.0
			phoA_2–KOPPCICB_04476	∆11024 nt	NODE_46_length_22207	1–11,024	100
	TIVAP 5_silicone septum	wcaK ← / ← wzxC	colanic acid biosynthesis pyruvyl transferase WcaK/colanic acid undecaprenyl disphosphate flippase WzxC	intergenic (‑122/+126)	NODE_6_length_201492	123.903	36.2
		wcaK ← / ← wzxC	colanic acid biosynthesis pyruvyl transferase WcaK/colanic acid undecaprenyl disphosphate flippase WzxC	intergenic (‑149/+111)	NODE_6_length_201492	123,930	37.8
			phoA_2–KOPPCICB_04476	∆11024 nt	NODE_46_length_22207	1–11,024	100
	TIVAP 5_port	ribE_2 ←	6,7‑dimethyl‑8‑ribityllumazine synthase	G56S (GGT→AGT)	NODE_13_length_127516	94.714	75.4
		cusS_3 →	Cu(+)/Ag(+) sensor histidine kinase CusS	A191T (GCA→ACA)	NODE_24_length_89816	88.135	7.9
			phoA_2–KOPPCICB_04476	∆11024 nt	NODE_46_length_22207	1–11,024	100
	TIVAP 5_catheter	aceE ←	pyruvate dehydrogenase (acetyl‑transferring), homodimeric type	M1T (ATG→ACG) †	NODE_2_length_300668	92.046	27.7
		nuoB ←	NADH‑quinone oxidoreductase subunit NuoB	C129S (TGT→AGT)	NODE_4_length_219912	174.783	19.8
		wza_1 ←	polysaccharide export protein Wza	T75T (ACG→ACA)	NODE_6_length_201492	142.579	18.8
			phoA_2–KOPPCICB_04476	∆11024 nt	NODE_46_length_22207	1–11,024	100
	TIVAP 6_silicone septum	ftsK ←	DNA translocase FtsK	coding (2316/4068 nt)	NODE_14_length_126991	49.039	6.0
		nuoN ←	NADH‑quinone oxidoreductase subunit NuoN	coding (1235/1458 nt)	NODE_4_length_219912	160.825	13.9
		nuoC ←	NADH‑quinone oxidoreductase subunit C/D	coding (1611/1803 nt)	NODE_4_length_219912	172.801	74.8
		wcaK ← / ← wzxC	colanic acid biosynthesis pyruvyl transferase WcaK/colanic acid undecaprenyl disphosphate flippase WzxC	intergenic (‑149/+111)	NODE_6_length_201492	123,930	46.5
	TIVAP 6_port	wcaK ← / ← wzxC	colanic acid biosynthesis pyruvyl transferase WcaK/colanic acid undecaprenyl disphosphate flippase WzxC	intergenic (‑149/+111)	NODE_6_length_201492	123,930	41.6
		fusA ←	elongation factor G	A678V (GCA→GTA)	NODE_7_length_189571	440	100
	TIVAP 6_catheter	xylH →	xylose ABC transporter permease XylH	V141I (GTC→ATC)	NODE_19_length_100622	72.348	5.3
		gcvP ←	aminomethyl‑transferring glycine dehydrogenase	P538S (CCG→TCG)	NODE_25_length_87974	5.026	5.9
		nuoF ←	NADH‑quinone oxidoreductase subunit NuoF	coding (212‑275/1338 nt)	NODE_4_length_219912	171.835	7.2
		fusA ←	elongation factor G	A678V (GCA→GTA)	NODE_7_length_189571	440	100
		wcaK ← / ← wzxC	colanic acid biosynthesis pyruvyl transferase WcaK/colanic acid undecaprenyl disphosphate flippase WzxC	intergenic (‑122/+126)	NODE_6_length_201492	123.903	22.0
		wcaK ← / ← wzxC	colanic acid biosynthesis pyruvyl transferase WcaK/colanic acid undecaprenyl disphosphate flippase WzxC	intergenic (‑149/+111)	NODE_6_length_201492	123,930	32.9
Experiment	Sample (TIVAP)	Locus name	Annotation	Mutations	NODE	Genomic position	Frequency(%)
55989pAT881 in vitro TPN experiment
	TIVAP 4_silicone septum	Not Determined
	TIVAP 4_port	Not Determined
	TIVAP 4_catheter	Not Determined
	TIVAP 5_silicone septum	dnaE ←	DNA polymerase III subunit alpha	L619P (CTG→CCG) ‡	NODE_2_length_300668	9.122	6.6
		osmE → / → chbB_1	osmotically‑inducible lipoprotein OsmE/PTS N,N'‑diacetylchitobiose transporter subunit IIB	intergenic (+50/‑249)	NODE_3_length_257554	89.717	8.2
		hisJ ← / ← argT	histidine ABC transporter substrate‑binding protein HisJ/lysine/arginine/ornithine ABC transporter substrate‑binding protein ArgT	intergenic (‑188/+33)	NODE_4_length_219912	197.542	20.0
		recD →	exodeoxyribonuclease V subunit alpha	N127N (AAT→AAC)	NODE_5_length_210475	97.145	6.0
		amn →	AMP nucleosidase	A73T (GCA→ACA)	NODE_6_length_201492	45,180	6.5
		sbcB →	exodeoxyribonuclease I	G160S (GGT→AGT)	NODE_6_length_201492	89.496	12.4
		fusA ←	elongation factor G	S672F (TCT→TTT)	NODE_7_length_189571	458	5.1
		greA → / ← yhbY	transcription elongation factor GreA/ribosome assembly RNA‑binding protein YhbY	intergenic (+34/+122)	NODE_10_length_148378	87.536	14.5
		decR ← / ← cof	DNA‑binding transcriptional regulator DecR/HMP‑PP phosphatase	intergenic (‑120/+33)	NODE_13_length_127516	59.116	13.1
		KOPPCICB_02389 →	hypothetical protein	*38Y (TAG→TAT)	NODE_13_length_127516	96.788	5.2
		dmsB_2 ←	dimethylsulfoxide reductase subunit B	C105C (TGC→TGT)	NODE_14_length_126991	40.776	13.0
		ytfT →	ABC transporter permease	L193L (CTG→TTG)	NODE_15_length_125270	107.876	6.1
		flgF ←	flagellar basal‑body rod protein FlgF	I234T (ATC→ACC)	NODE_16_length_109536	70.437	7.0
		glnH →	glutamine ABC transporter substrate‑binding protein GlnH	A17V (GCG→GTG)	NODE_17_length_102921	9.751	35.7
		cutC → / → torY	copper homeostasis protein CutC/NapC/NirT family cytochrome c	intergenic (+80/‑308)	NODE_18_length_101264	52,270	18.8
		lsrB_1 →	Autoinducer 2‑binding protein LsrB	M2I (ATG→ATA)	NODE_22_length_94307	78.144	17.0
		cpxA ←	envelope stress sensor histidine kinase CpxA	T6I (ACC→ATC)	NODE_26_length_84763	62,260	100
		dcyD ←	D‑cysteine desulfhydrase	A163V (GCT→GTT)	NODE_28_length_59382	22.761	7.3
		fimA_4 →	type 1 fimbrial major subunit FimA	A4T (GCA→ACA)	NODE_32_length_45441	35.844	8.6
		nrfB_2 ←	cyclic di‑3',5'‑guanylate‑activated glycosyltransferase NrfB	R454C (CGC→TGC)	NODE_32_length_45441	43.022	6.4
	TIVAP 5_port	KOPPCICB_00002 ←	fimbrial protein	A97A (GCT→GCC)	NODE_1_length_302008	1.201	9.4
		rseC ←	SoxR‑reducing system protein RseC	A105T (GCA→ACA)	NODE_1_length_302008	282.515	6.2
		arnB →	UDP‑4‑amino‑4‑deoxy‑L‑arabinose aminotransferase	A257V (GCA→GTA)	NODE_4_length_219912	141.657	5.5
		elaD →	Protease ElaD	C254C (TGC→TGT)	NODE_4_length_219912	158.455	32.4
		nuoF ←	NADH‑quinone oxidoreductase subunit NuoF	K200N (AAA→AAC)	NODE_4_length_219912	171,510	6.7
		yfcL ←	YfcL family protein	I2T (ATC→ACC)	NODE_4_length_219912	214.759	8.3
		wcaK ← / ← wzxC	colanic acid biosynthesis pyruvyl transferase WcaK/colanic acid undecaprenyl disphosphate flippase WzxC	intergenic (‑149/+111)	NODE_6_length_201492	123,930	55.1
		fusA ←	elongation factor G	S672F (TCT→TTT)	NODE_7_length_189571	458	9.9
		dgoD →	galactonate dehydratase	D332E (GAC→GAA)	NODE_9_length_182868	75.104	5.1
		dinF ←	MATE family efflux transporter DinF	R216R (CGC→CGT)	NODE_11_length_146460	99.089	5.2
		pdeI ←	EAL domain‑containing protein	A748V (GCG→GTG)	NODE_14_length_126991	109.333	7.3
		treR ←	trehalose operon repressor TreR	K271R (AAA→AGA)	NODE_15_length_125270	121,190	8.4
		glnH →	glutamine ABC transporter substrate‑binding protein GlnH	A17V (GCG→GTG)	NODE_17_length_102921	9.751	30.6
		glnQ → / → ybiO	glutamine ABC transporter ATP‑binding protein GlnQ/mechanosensitive channel protein	intergenic (+41/‑76)	NODE_17_length_102921	12.006	10.2
		purT ←	formate‑dependent phosphoribosylglycinamide formyltransferase	L140I (CTT→ATT)	NODE_18_length_101264	79.287	13.3
		phoE ← / → proB	phosphoporin PhoE/glutamate 5‑kinase	intergenic (‑28/‑260)	NODE_22_length_94307	7.768	6.8
		dpiB ←	sensor histidine kinase DpiB	T333T (ACG→ACA)	NODE_24_length_89816	30.213	11.8
		cpxA ←	envelope stress sensor histidine kinase CpxA	T6I (ACC→ATC)	NODE_26_length_84763	62,260	100
		yccA →	FtsH protease modulator YccA	A39T (GCA→ACA)	NODE_30_length_50383	3.296	7.4
		KOPPCICB_03935 →	hypothetical protein	A51A (GCG→GCA)	NODE_31_length_48846	3.619	21.7
		nfrA ←	bacteriophage adsorption protein NfrA	N4N (AAT→AAC)	NODE_32_length_45441	42.146	21.5
		nrfB_2 ←	cyclic di‑3',5'‑guanylate‑activated glycosyltransferase NrfB	*746Q (TAA→CAA)
		– / → gfcA	–/Threonine‑rich inner membrane protein GfcA	intergenic (–/‑683)	NODE_48_length_21259	89	7.8
	TIVAP 5_catheter	mdh → / ← degS	malate dehydrogenase/outer membrane‑stress sensor serine endopeptidase DegS	intergenic (+40/+23)	NODE_10_length_148378	39.935	7.8
		glnH →	glutamine ABC transporter substrate‑binding protein GlnH	A17V (GCG→GTG)	NODE_17_length_102921	9.751	28.0
		dpiB ←	sensor histidine kinase DpiB	C529C (TGC→TGT)	NODE_24_length_89816	29.625	5.3
		cpxA ←	envelope stress sensor histidine kinase CpxA	T6I (ACC→ATC)	NODE_26_length_84763	62,260	100
		ymdF_3 ← / → wrbA	general stress protein/NAD(P)H:quinone oxidoreductase	intergenic (‑213/‑160)	NODE_36_length_41245	24.571	11.9
	TIVAP 6_silicone septum	xanQ ← / ← xdhD	xanthine/proton symporter XanQ/molybdopterin‑dependent oxidoreductase Mo/Fe‑S‑binding subunit	intergenic (‑151/+14)	NODE_5_length_210475	18.215	9.5
		irp1 →	yersiniabactin polyketide synthase HMWP1	A517V (GCG→GTG)	NODE_6_length_201492	24.988	5.1
		sbcB →	exodeoxyribonuclease I	D158D (GAT→GAC)	NODE_6_length_201492	89.492	8.2
		fusA ←	elongation factor G	A678V (GCA→GTA)	NODE_7_length_189571	440	49.0
		fusA ←	elongation factor G	S672F (TCT→TTT)	NODE_7_length_189571	458	44.2
		adeP →	adenine permease AdeP	Q8H (CAG→CAT)	NODE_9_length_182868	50,520	5.2
		acrE ← / → acrS_1	multidrug efflux RND transporter periplasmic adaptor subunit AcrE/multidrug efflux transporter transcriptional repressor AcrS	intergenic (‑28/‑371)	NODE_10_length_148378	9.669	7.2
		pmbA →	metalloprotease PmbA	H187R (CAT→CGT)	NODE_15_length_125270	113.239	8.0
		glnH →	glutamine ABC transporter substrate‑binding protein GlnH	A17V (GCG→GTG)	NODE_17_length_102921	9.751	27.2
		dpiB ←	sensor histidine kinase DpiB	T333T (ACG→ACA)	NODE_24_length_89816	30.213	7.7
		cpxA ←	envelope stress sensor histidine kinase CpxA	D162E (GAC→GAA)	NODE_26_length_84763	61.791	100
		repA ←	Replication initiation protein	I132V (ATC→GTC)	NODE_39_length_32797	8.339	16.2
	TIVAP 6_port	sfsA →	DNA/RNA nuclease SfsA	E2E (GAA→GAG)	NODE_2_length_300668	53.786	6.0
		yjjQ ← / → yjjP	response regulator transcription factor/threonine/serine exporter ThrE family protein	intergenic (‑380/‑241)	NODE_2_length_300668	252.353	7.5
		KOPPCICB_00741 ←	DNA helicase	R167H (CGC→CAC)	NODE_3_length_257554	181.786	8.7
		glpA →	anaerobic glycerol‑3‑phosphate dehydrogenase subunit A	L432M (CTG→ATG)	NODE_4_length_219912	132.976	6.0
		nuoF ←	NADH‑quinone oxidoreductase subunit NuoF	P292L (CCA→CTA)	NODE_4_length_219912	171.235	5.8
		fusA ←	elongation factor G	R671H (CGT→CAT)	NODE_7_length_189571	461	29.7
		tdcA_1 →	transcriptional regulator TdcA	P111S (CCA→TCA)	NODE_8_length_185138	92.865	7.0
		plsB →	glycerol‑3‑phosphate 1‑O‑acyltransferase PlsB	Q121* (CAG→TAG)	NODE_11_length_146460	101.426	5.7
		rlmG →	23S rRNA (guanine(1835)‑N(2))‑methyltransferase RlmG	P262S (CCG→TCG)	NODE_12_length_131193	39.984	5.0
		ushA ←	bifunctional UDP‑sugar hydrolase/5'‑nucleotidase	I444T (ATT→ACT)	NODE_13_length_127516	21.136	7.6
		orn →	oligoribonuclease	R22C (CGC→TGC)	NODE_15_length_125270	45,340	6.8
		flgF ←	flagellar basal‑body rod protein FlgF	I234T (ATC→ACC)	NODE_16_length_109536	70.437	5.5
		narJ ←	nitrate reductase molybdenum cofactor assembly chaperone	A16T (GCT→ACT)	NODE_21_length_95713	30.921	5.3
		mtlA_2 ←	PTS mannitol transporter subunit IICBA	A193V (GCG→GTG)	NODE_25_length_87974	39,360	8.2
		cpxA ←	envelope stress sensor histidine kinase CpxA	D162E (GAC→GAA)	NODE_26_length_84763	61.791	100
	TIVAP 6_catheter	yjjU ←	patatin family protein	R48C (CGC→TGC)	NODE_2_length_300668	243.093	6.2
		apbE ← / ← ompC_1	FAD:protein FMN transferase ApbE/porin OmpC	intergenic (‑83/+29)	NODE_4_length_219912	98.032	9.2
		yfbM → / ← nuoN	YfbM family protein/NADH‑quinone oxidoreductase subunit NuoN	intergenic (+24/+43)	NODE_4_length_219912	160.559	9.9
		xanQ ←	xanthine/proton symporter XanQ	G123G (GGC→GGT)	NODE_5_length_210475	17.696	5.8
		hyuA ←	D‑phenylhydantoinase	I68I (ATC→ATT)	NODE_5_length_210475	32.004	6.2
		cobU ← / → KOPPCICB_01252	bifunctional adenosylcobinamide kinase/adenosylcobinamide‑phosphate guanylyltransferase/IS66 family transposase	intergenic (‑1563/‑192)	NODE_6_length_201492	57.226	8.4
		fusA ←	elongation factor G	S672F (TCT→TTT)	NODE_7_length_189571	458	32.0
		fusA ←	elongation factor G	R671H (CGT→CAT)	NODE_7_length_189571	461	47.7
		fusA ←	elongation factor G	E100K (GAA→AAA)	NODE_7_length_189571	2.175	6.2
		dut ←	dUTP diphosphatase	P12S (CCG→TCG)	NODE_9_length_182868	133.284	6.8
		KOPPCICB_01892 ←	YadA‑like family protein	T645T (ACG→ACT)	NODE_9_length_182868	170.146	5.3
		cadA →	lysine decarboxylase CadA	A25A (GCG→GCA)	NODE_11_length_146460	6.597	9.4
		uxaC →	glucuronate isomerase	S404S (AGC→AGT)	NODE_12_length_131193	31.555	5.1
		copA_3 →	copper‑exporting P‑type ATPase CopA	L121L (CTG→CTA)	NODE_13_length_127516	16.565	5.9
		yebT ←	PqiB family protein	V675A (GTA→GCA)	NODE_18_length_101264	91.052	9.9
		cpxA ←	envelope stress sensor histidine kinase CpxA	D162E (GAC→GAA)	NODE_26_length_84763	61.791	100
		rutG →	pyrimidine utilization transport protein G	P51S (CCG→TCG)	NODE_36_length_41245	22.924	7.7
Experiment	Sample (TIVAP)	Locus name	Annotation	Mutations	NODE	Genomic position	Frequency(%)
55989pAT881 in vivo experiment
	TIVAP 4_silicone septum	eutC ←	ethanolamine ammonia‑lyase subunit beta	A219V (GCG→GTG)	NODE_1_length_302008	138.183	5.3
		cfa ← / ← punC	cyclopropane fatty acyl phospholipid synthase/purine nucleoside transporter PunC	intergenic (‑49/+242)	NODE_3_length_257554	170.024	5.3
		xanQ ← / ← xdhD	xanthine/proton symporter XanQ/molybdopterin‑dependent oxidoreductase Mo/Fe‑S‑binding subunit	intergenic (‑151/+14)	NODE_5_length_210475	18.215	8.4
		fusA ←	elongation factor G	S672F (TCT→TTT)	NODE_7_length_189571	458	17.3
		fusA ←	elongation factor G	R671H (CGT→CAT)	NODE_7_length_189571	461	75.4
		nikC →	nickel ABC transporter permease subunit NikC	Q37H (CAG→CAT)	NODE_7_length_189571	148.367	5.7
		dcuC_1 ← / → nanR	anaerobic C4‑dicarboxylate transporter DcuC/transcriptional regulator NanR	intergenic (‑154/‑226)	NODE_10_length_148378	48,510	5.0
		glnH →	glutamine ABC transporter substrate‑binding protein GlnH	A17V (GCG→GTG)	NODE_17_length_102921	9.751	27.0
		pheA ←	bifunctional chorismate mutase/prephenate dehydratase	A119V (GCG→GTG)	NODE_20_length_98480	91.789	5.7
		pagP ←	lipid IV(A) palmitoyltransferase PagP	T68N (ACC→AAC)	NODE_24_length_89816	26.687	5.3
		tdh_2 ←	L‑threonine 3‑dehydrogenase	P85P (CCG→CCA)	NODE_24_length_89816	41.105	5.7
		fimA_3 →	type 1 fimbrial major subunit FimA	A13T (GCA→ACA)	NODE_32_length_45441	30.746	6.3
		slp → / → KOPPCICB_04224	outer membrane lipoprotein Slp/hypothetical protein	intergenic (+16/‑140)	NODE_38_length_35609	23.889	5.9
		repA ←	Replication initiation protein	I132V (ATC→GTC)	NODE_39_length_32797	8.339	8.6
		mhpT →	3‑(3‑hydroxy‑phenyl)propionate transporter MhpT	A153A (GCG→GCA)	NODE_47_length_22038	20.527	5.8
	TIVAP 4_port	nuoC ←	NADH‑quinone oxidoreductase subunit C/D	G433W (GGG→TGG)	NODE_4_length_219912	173.115	29.3
		wcaK ← / ← wzxC	colanic acid biosynthesis pyruvyl transferase WcaK/colanic acid undecaprenyl disphosphate flippase WzxC	intergenic (‑122/+126)	NODE_6_length_201492	123.903	24.6
		wcaK ← / ← wzxC	colanic acid biosynthesis pyruvyl transferase WcaK/colanic acid undecaprenyl disphosphate flippase WzxC	intergenic (‑149/+111)	NODE_6_length_201492	123,930	44.8
		fusA ←	elongation factor G	S672F (TCT→TTT)	NODE_7_length_189571	458	45.7
		fusA ←	elongation factor G	R671H (CGT→CAT)	NODE_7_length_189571	461	12.7
		tgt ←	tRNA guanosine(34) transglycosylase Tgt	R64C (CGC→TGC)	NODE_13_length_127516	103,200	6.7
		KOPPCICB_02533 ← / ← sat	hypothetical protein/serine protease autotransporter toxin Sat	intergenic (‑25/+22)	NODE_15_length_125270	4.452	5.2
		fucP_2 →	L‑fucose:H+ symporter permease	C34C (TGC→TGT)	NODE_51_length_19831	3.368	5.0
	TIVAP 4_catheter	elaD →	Protease ElaD	C254C (TGC→TGT)	NODE_4_length_219912	158.455	29.8
		fusA ←	elongation factor G	A592V (GCG→GTG)	NODE_7_length_189571	698	100
		trpE ←	anthranilate synthase component I	A336V (GCC→GTC)	NODE_8_length_185138	12.972	6.1
		abgT ←	p‑aminobenzoyl‑glutamate transport protein	L394F (CTT→TTT)	NODE_8_length_185138	88.388	15.0
		waaG →	glycosyltransferase family 4 protein	A312T (GCT→ACT)	NODE_9_length_182868	141.107	9.8
		fimI_1 ←	fimbrial protein	A20V (GCC→GTC)	NODE_10_length_148378	128,380	7.1
		garR →	2‑hydroxy‑3‑oxopropionate reductase	C59C (TGC→TGT)	NODE_10_length_148378	145.585	6.7
		ndh ←	NADH‑quinone dehydrogenase	L224V (TTA→GTA)	NODE_16_length_109536	38.176	100
		glnP →	glutamine ABC transporter permease GlnP	A7V (GCC→GTC)	NODE_17_length_102921	10.606	5.4
		pepD ←	cytosol nonspecific dipeptidase	G109D (GGC→GAC)	NODE_22_length_94307	3.807	5.9
		ubiF →	3‑demethoxyubiquinol 3‑hydroxylase	coding (119/1176 nt)	NODE_33_length_45070	12.798	100
		gadE →	acid resistance transcriptional activator GadE	T139T (ACG→ACA)	NODE_38_length_35609	28.128	10.3
		repA ←	Replication initiation protein	I132V (ATC→GTC)	NODE_39_length_32797	8.339	11.8
	TIVAP 5_silicone septum	yojI ← / ← alkB	microcin J25 efflux ABC transporter YojI/DNA oxidative demethylase AlkB	intergenic (‑22/+54)	NODE_4_length_219912	95.052	19.9
		sbcB →	exodeoxyribonuclease I	G160S (GGT→AGT)	NODE_6_length_201492	89.496	14.7
		wcaK ← / ← wzxC	colanic acid biosynthesis pyruvyl transferase WcaK/colanic acid undecaprenyl disphosphate flippase WzxC	intergenic (‑122/+126)	NODE_6_length_201492	123.903	34.8
		wcaK ← / ← wzxC	colanic acid biosynthesis pyruvyl transferase WcaK/colanic acid undecaprenyl disphosphate flippase WzxC	intergenic (‑149/+111)	NODE_6_length_201492	123,930	37.2
		fusA ←	elongation factor G	S672F (TCT→TTT)	NODE_7_length_189571	458	31.9
		fusA ←	elongation factor G	R671H (CGT→CAT)	NODE_7_length_189571	461	24.9
		KOPPCICB_01449 ←	hypothetical protein	R503W (CGG→TGG)	NODE_7_length_189571	59.945	6.3
		atpG →	F0F1 ATP synthase subunit gamma	coding (739‑763/864 nt)	NODE_9_length_182868	24.448	25.5
		atpG →	F0F1 ATP synthase subunit gamma	A286V (GCG→GTG)	NODE_9_length_182868	24.566	7.3
		rcdA ← / → ybjJ	DNA‑binding transcriptional regulator RcdA/MFS transporter	intergenic (‑161/‑4)	NODE_14_length_126991	97.292	6.1
		entF ←	enterobactin non‑ribosomal peptide synthetase EntF	P774S (CCG→TCG)	NODE_24_length_89816	66.854	7.9
		ydeA →	L‑arabinose MFS transporter	A114V (GCG→GTG)	NODE_27_length_82088	49.403	10.3
		yccS →	YccS family putative transporter	L441M (CTG→ATG)	NODE_30_length_50383	12.028	8.2
	TIVAP 5_port	Not Determined
	TIVAP 5_catheter	fusA ←	elongation factor G	S672F (TCT→TTT)	NODE_7_length_189571	458	50.5
		fusA ←	elongation factor G	R671H (CGT→CAT) ‡	NODE_7_length_189571	461	37.2
		fusA ←	elongation factor G	R671C (CGT→TGT) ‡	NODE_7_length_189571	462	8.2
		yhiI ←	HlyD family secretion protein	L26P (CTG→CCG)	NODE_7_length_189571	156.721	5.7
		glnE →	bifunctional [glutamate‑‑ammonia ligase]‑adenylyl‑L‑tyrosine phosphorylase/[glutamate‑‑ammonia‑ ligase]adenylyltransferase	R88C (CGC→TGC)	NODE_12_length_131193	75.243	5.7
		rne →	ribonuclease E	A893T (GCT→ACT)	NODE_16_length_109536	63.247	6.9
		dhaR ←	dihydroxyacetone kinase operon transcriptional regulator DhaR	K25Q (AAG→CAG)	NODE_21_length_95713	64.434	5.2
	TIVAP 6_silicone septum	Not Determined
	TIVAP 6_port	Not Determined
	TIVAP 6_catheter	eutE ←	aldehyde dehydrogenase EutE	Q3R (CAA→CGA)	NODE_1_length_302008	146.595	6.4
		focA_1 →	formate transporter FocA	L53P (CTT→CCT)	NODE_1_length_302008	189.743	5.1
		gspE_1 →	type II secretion system ATPase GspE	L338F (CTC→TTC)	NODE_2_length_300668	98.976	11.1
		secM ←	secA translation cis‑regulator SecM	D20D (GAT→GAC)	NODE_2_length_300668	107.259	11.6
		nuoJ ←	NADH‑quinone oxidoreductase subunit J	coding (205‑210/555 nt)	NODE_4_length_219912	166.241	53.9
		xanQ ← / ← xdhD	xanthine/proton symporter XanQ/molybdopterin‑dependent oxidoreductase Mo/Fe‑S‑binding subunit	intergenic (‑151/+14)	NODE_5_length_210475	18.215	9.8
		eno →	phosphopyruvate hydratase	C247Y (TGC→TAC)	NODE_5_length_210475	141.642	5.4
		wcaK ← / ← wzxC	colanic acid biosynthesis pyruvyl transferase WcaK/colanic acid undecaprenyl disphosphate flippase WzxC	intergenic (‑122/+126)	NODE_6_length_201492	123.903	39.6
		wcaK ← / ← wzxC	colanic acid biosynthesis pyruvyl transferase WcaK/colanic acid undecaprenyl disphosphate flippase WzxC	intergenic (‑149/+111)	NODE_6_length_201492	123,930	42.3
		fusA ←	elongation factor G	S672F (TCT→TTT)	NODE_7_length_189571	458	84.3
		fusA ←	elongation factor G	R671H (CGT→CAT)	NODE_7_length_189571	461	6.0
		yibL ← / → yibT	YibL family ribosome‑associated protein/protein YibT	intergenic (‑250/‑35)	NODE_9_length_182868	173.963	6.1
		KOPPCICB_02533 ← / ← sat	hypothetical protein/serine protease autotransporter toxin Sat	intergenic (‑32/+15)	NODE_15_length_125270	4.459	8.9
		bax ←	protein bax	A227V (GCG→GTG)	NODE_19_length_100622	74.706	7.4
		yihI →	Der GTPase‑activating protein YihI	R167W (CGG→TGG)	NODE_26_length_84763	11.091	6.6
		fimA_2 ← / ← hipA	type 1 fimbrial major subunit FimA/type II toxin‑antitoxin system serine/threonine protein kinase toxin HipA	intergenic (‑762/+191)	NODE_27_length_82088	22.217	5.2
		mgtS → / ← dgcZ	protein MgtS/diguanylate cyclase DgcZ	intergenic (+85/+135)	NODE_27_length_82088	61.109	22.1
		yedE →	selenium metabolism membrane protein YedE/FdhT	G333D (GGC→GAC)	NODE_28_length_59382	32,420	7.6
		yjgN ←	YjgN family protein	E22K (GAG→AAG)	NODE_31_length_48846	39.752	5.5
		cirA_2 ←	catecholate siderophore receptor CirA	L83L (CTC→CTT)	NODE_34_length_43570	2.489	10.4
		repA ←	Replication initiation protein	I132V (ATC→GTC)	NODE_39_length_32797	8.339	12.5
		yaiP →	glycosyltransferase family 2 protein	A182T (GCA→ACA)	NODE_46_length_22207	17.448	6.0
		lacI ←	DNA‑binding transcriptional repressor LacI	A189V (GCG→GTG)	NODE_47_length_22038	11.966	9.5
