# Supplementary material for: Intermittent treatment of Escherichia coli biofilms leads to antibiotic resistance in vitro and in a pre-clinical in vivo model of catheter-related infection
Source: Research Square preprint supplement (doi:10.21203/rs.3.rs-7244857/v1), 2025-09-22
Supplement: Supplementary file 2 [file 66e1a20c00b935e78209322b.docx]

**Table S2. Bacterial strains and plasmids used in this study**

| ***E. coli* strains** | **Description** | **Reference** |
| --- | --- | --- |
| LF82 (LF82*∆ampC*::mars) | A derivative of adherent invasive *E. coli* LF821) isolated from an ileal biopsy of a Crohn’s disease patient. LF82Δ*ampC*::mars-FRT. Deletion of *ampC* by mars-KmFRT and removal of the kanamycin resistance. | 2) |
| 55989 | Enteroaggregative *E. coli* | 3) |
| 55989pAT881 | A 55989 strain transformed with stable plasmid pAT881 | 4) |

1) Glasser AL, Boudeau J, Barnich N, Perruchot MH, Colombel JF, Darfeuille-Michaud A. Adherent invasive *Escherichia coli* strains from patients with Crohn's disease survive and replicate within macrophages without inducing host cell death. Infect Immun. 2001 Sep;69(9):5529-37.

2) Usui M, Yoshii Y, Thiriet-Rupert S, Ghigo JM, Beloin C. Intermittent antibiotic treatment of bacterial biofilms favors the rapid evolution of resistance. Commun Biol. 2023 Mar 16;6(1):275.

3) Bernier C, Gounon P, Le Bouguénec C. Identification of an aggregative adhesion fimbria (AAF) type III-encoding operon in enteroaggregative *Escherichia coli* as a sensitive probe for detecting the AAF-encoding operon family. Infect Immun. 2002 Aug;70(8):4302-11.

4) Chauhan A, Lebeaux D, Decante B, Kriegel I, Escande MC, Ghigo JM, Beloin C. A rat model of central venous catheter to study establishment of long-term bacterial biofilm and related acute and chronic infections. PLoS One. 2012;7(5):e37281.
