# Supplementary material for: Intermittent treatment of Escherichia coli biofilms leads to antibiotic resistance in vitro and in a pre-clinical in vivo model of catheter-related infection
Source: Research Square preprint supplement (doi:10.21203/rs.3.rs-7244857/v1), 2025-09-22
Supplement: Supplementary file 3 [file 985748b6d759db59a27fed60.xlsx]

## Sheet: Fig. S1c
Fig. S1c
	CFU numbers (CFU/mL)
	Time		TIVAP 1	TIVAP 2	TIVAP 3
	Growth	1 h	10	10	10
		4 h	20	60	360
		12 h	30000000	13000000	35000000
		24 h	95000000	90000000	120000000
		36 h	550000000	400000000	170000000
		48 h	350000000	600000000	650000000
	The bacterial count was below the detection limit and plotted as 10.

## Sheet: Fig. S1d
Fig. S1d
	Biofilm cells on each part (CFU/part)
		TIVAP 1	TIVAP 2	TIVAP 3
	Slicone septum	340000000	55000000	155000000
	Port	310000000	105000000	170000000
	Catheter	30000000	11000000	15500000
	Total	680000000	171000000	340500000

## Sheet: Fig. S1e
Fig. S1e
		PBS				5xMIC				80xMIC				500xMIC
Time		PBS (mean)	TIVAP 1	TIVAP 2	TIVAP 3	5xMIC (mean)	TIVAP 4	TIVAP 5	TIVAP 6	80xMIC (mean)	TIVAP 1	TIVAP 2	TIVAP 3	500xMIC (mean)	TIVAP 4	TIVAP 5	TIVAP 6
Growth	1 h	10	10	10	10	20	30	20	10	26.6667	50	20	10	16.6667	10	10	30
	4 h	256.667	270	100	400	580	370	870	500	460	100	480	800	633.333	600	900	400
	24 h	1.93333e+08	500000000	30000000	50000000	160000000	180000000	240000000	60000000	110000000	100000000	150000000	80000000	70000000	80000000	90000000	40000000
	48 h	6.33333e+08	700000000	600000000	600000000	5.33333e+08	500000000	600000000	500000000	300000000	700000000	100000000	100000000	4.66667e+08	500000000	300000000	600000000
		1-day ALTPBS treatment				1-day ALT5-fold AMK treatment				1-day ALT80-fold AMK treatment				1-day ALT500-fold AMK treatment
Recovery	1 h	1.13333e+07	16000000	8000000	10000000	1.03333e+07	19000000	9000000	3000000	2700000	2000000	6000000	100000	266.667	100	600	100
		The bacterial counts were below the detection limit and plotted as 10.

## Sheet: Fig. S1f
Fig. S1f
	1-day ALT	PBS			5xMIC			80xMIC			500xMIC
		TIVAP 1	TIVAP 2	TIVAP 3	TIVAP 1	TIVAP 2	TIVAP 3	TIVAP 1	TIVAP 2	TIVAP 3	TIVAP 1	TIVAP 2	TIVAP 3
	Biofilm cells (CFU/TIVAP)	114000000	90300000	110400000	900000	17000000	5360000	360000	1660000	130000	6590	8300	10090
		PBS			5xMIC			80xMIC			500xMIC
	Biofilm cells on each part (CFU/part)	TIVAP 1	TIVAP 2	TIVAP 3	TIVAP 1	TIVAP 2	TIVAP 3	TIVAP 1	TIVAP 2	TIVAP 3	TIVAP 4	TIVAP 5	TIVAP 6
	Slicone	110000000	30000000	30000000	500000	4000000	60000	100000	60000	20000	6000	200	5000
	Port	4000000	60000000	80000000	400000	13000000	5000000	260000	1600000	100000	500	8000	5000
	Catheter	0	300000	400000	0	0	300000	0	0	10000	90	100	90
	Total	114000000	90300000	110400000	900000	17000000	5360000	360000	1660000	130000	6590	8300	10090

## Sheet: Fig. 1c
Fig. 1c
	CFU numbers (CFU/mL)
			PBS				AMK
	Time		PBS (mean)	TIVAP 1	TIVAP 2	TIVAP 3	AMK (mean)	TIVAP 4	TIVAP 5	TIVAP 6
	Growth	1 h	55	35	70	60	18.3333	10	10	35
		4 h	300	600	100	200	800	800	100	1500
		24 h	1.33333e+08	70000000	170000000	160000000	9.33333e+07	70000000	110000000	100000000
		48 h	3.16667e+08	300000000	330000000	320000000	4.66667e+08	300000000	100000000	1000000000
			Continuous 10-day ALTPBS treatment				Continuous 10-day ALTAMK treatment
	Recovery	1 h	453333	1100000	170000	90000	10	10	10	10
		4 h	5.33333e+06	5000000	6000000	5000000	10	10	10	10
		24 h	1100000000	600000000	1500000000	1200000000	10	10	10	10
		48 h	1.46667e+08	60000000	260000000	120000000	10	10	10	10
		72 h	1.56667e+08	180000000	190000000	100000000	10	10	10	10
							The bacterial counts were below the detection limit and plotted as 10.

## Sheet: Fig. 1d
Fig. 1d
	CFU numbers (CFU/mL)
			PBS				AMK
	Time		PBS (mean)	TIVAP 1	TIVAP 2	TIVAP 3	AMK (mean)	TIVAP 4	TIVAP 5	TIVAP 6
	Growth	1 h	36.6667	30	35	45	13.3333	10	10	20
		4 h	933.333	1100	700	1000	766.667	400	1000	900
		24 h	7.33333e+07	50000000	90000000	80000000	9.33333e+07	60000000	140000000	80000000
		48 h	1.03333e+09	900000000	1000000000	1200000000	800000000	600000000	400000000	1400000000
			Continuous 7-day ALTPBS treatment				Continuous 7-day ALTAMK treatment
	Recovery	1 h	1.53333e+06	3000000	1000000	600000	10	10	10	10
		24 h	1.66667e+08	200000000	200000000	100000000	230000000	40000000	50000000	600000000
		48 h	2.33333e+08	300000000	100000000	300000000	2200000000	300000000	6000000000	300000000
		72 h	1.93333e+08	80000000	200000000	300000000	1.66667e+08	80000000	300000000	120000000
								The bacterial counts were below the detection limit and plotted as 10.

## Sheet: Fig. 1e
Fig. 1e
	10-day continuous ALT	PBS			AMK
		TIVAP 1	TIVAP 2	TIVAP 3	TIVAP 4	TIVAP 5	TIVAP 6
	Biofilm cells (CFU/TIVAP)	1100000000	530000000	2900000000	10	10	10
		PBS			AMK
	Biofilm cells on each part (CFU/part)	TIVAP 1	TIVAP 2	TIVAP 3	TIVAP 4	TIVAP 5	TIVAP 6
	Slicone	600000000	300000000	600000000	0	0	0
	Port	500000000	200000000	1500000000	0	0	0
	Catheter	0	30000000	800000000	0	0	0
	Total	1100000000	530000000	2900000000	10	10	10
					The bacterial counts were below the detection limit and plotted as 10.

## Sheet: Fig. 1f & Fig. S2a
Fig. 1f
	7-day continuous ALT	PBS			AMK
		TIVAP 1	TIVAP 2	TIVAP 3	TIVAP 4	TIVAP 5	TIVAP 6
	Biofilm cells (CFU/TIVAP)	3000000000	2004000000	110000000	4500000300	500000000	330600000
Fig. S2a
		PBS			AMK
	Biofilm cells on each part (CFU/part)	TIVAP 1	TIVAP 2	TIVAP 3	TIVAP 4	TIVAP 5	TIVAP 6
	Slicone	2000000000	600000000	70000000	500000000	100000000	600000
	Port	1000000000	1400000000	40000000	4000000000	400000000	150000000
	Catheter	0	4000000	0	300	0	180000000
	Total	3000000000	2004000000	110000000	4500000300	500000000	330600000

## Sheet: Fig. 1g & Fig.S2b
Fig. 1g
Fig. S2b
	Ancestor
			no.	LB plate (CFU/mL)	AMK plate at 1MIC (CFU/mL)	Growth Freq.(%)
		3 technical replication	1	7000000000	400000	0.00571429
			2	6000000000	300000	0.005
			3	5000000000	200000	0.004		mean GF	0.00490476
Fig.S2b
	Growth freq.		PBS									AMK
			TIVAP1			TIVAP2			TIVAP3			TIVAP4			TIVAP5			TIVAP6
			LB	AMK at1MIC	GF	LB	AMK at1MIC	GF	LB	AMK at1MIC	GF	LB	AMK at1MIC	GF	LB	AMK at1MIC	GF	LB	AMK at1MIC	GF
		Ancestor			0.00490476			0.00490476			0.00490476			0.00490476			0.00490476			0.00490476
		Growth (48 h)	900000000	100000	0.0111111	1000000000	180000	0.018	1200000000	180000	0.0125	600000000	110000	0.0183333	400000000	150000	0.0375	1400000000	200000	0.0142857
		Recovery (24 h)	200000000	200000	0.1	200000000	500000	0.25	100000000	90000	0.09	40000000	7000	0.0175	50000000	11000	0.022	600000000	100000	0.0166667
		Recovery (48 h)	300000000	100000	0.0333333	100000000	80000	0.08	300000000	800000	0.266667	300000000	1000000	0.333333	6000000000	900000	0.015	300000000	500000	0.166667
		Recovery (72 h)	80000000	40000	0.05	200000000	60000	0.03	300000000	60000	0.02	80000000	40000	0.05	300000000	200000	0.0666667	120000000	140000	0.116667
		Biofilms	3000000000	800000	0.0266667	2004000000	1301100	0.0649251	110000000	36000	0.0327273	4500000300	1000000	0.0222222	500000000	100000	0.02	330600000	151200	0.045735
	Biofilm data	Silicone	2000000000	400000	0.02	600000000	700000	0.116667	70000000	6000	0.00857143	500000000	400000	0.08	100000000	40000	0.04	600000	1200	0.2
		Port	1000000000	400000	0.04	1400000000	600000	0.0428571	40000000	30000	0.075	4000000000	600000	0.015	400000000	60000	0.015	150000000	80000	0.0533333
		Catheter	0	0	–	4000000	1100	0.0275	0	0	–	300	0	0	0	0	–	180000000	70000	0.0388889
		Total	3000000000	800000	0.0266667	2004000000	1301100	0.0649251	110000000	36000	0.0327273	4500000300	1000000	0.0222222	500000000	100000	0.02	330600000	151200	0.045735

## Sheet: Fig. 1h & Fig. S2c
Fig. 1h	Population amikacin MIC (µg/mL) in the 7-day continuous ALT experiment using LF82
Fig. S2c
			PBS
			TIVAP 1									TIVAP 2									TIVAP 3
			LB				MH					LB				MH					LB				MH
			Rep 1	Rep 2	Rep 3	Rep 4	Rep 1	Rep 2	Rep 3	Rep 4		Rep 1	Rep 2	Rep 3	Rep 4	Rep 1	Rep 2	Rep 3	Rep 4		Rep 1	Rep 2	Rep 3	Rep 4	Rep 1	Rep 2	Rep 3	Rep 4
		Silicone septum	16	16	16	16	4	4	4	4		16	16	16	16	4	4	4	4		16	16	16	16	4	4	4	4
		Port	16	16	16	16	4	4	4	4		16	16	16	16	4	4	4	4		16	16	16	16	4	4	4	4
		Catheter	–	–	–	–	–	–	–	–		16	16	16	16	4	4	4	4		–	–	–	–	–	–	–	–
			AMK
			TIVAP 4									TIVAP 5									TIVAP 6
			LB				MH					LB				MH					LB				MH
			Rep 1	Rep 2	Rep 3	Rep 4	Rep 1	Rep 2	Rep 3	Rep 4		Rep 1	Rep 2	Rep 3	Rep 4	Rep 1	Rep 2	Rep 3	Rep 4		Rep 1	Rep 2	Rep 3	Rep 4	Rep 1	Rep 2	Rep 3	Rep 4
		Silicone septum	16	16	16	16	4	4	4	4		16	16	16	16	4	4	4	4		16	16	16	16	4	4	4	4
		Port	16	16	16	16	4	4	4	4		16	16	16	16	4	4	4	4		16	16	16	16	4	4	4	4
		Catheter	16	16	16	16	4	4	4	4		–	–	–	–	–	–	–	–		16	16	16	16	4	4	4	4

[truncated: 16 more sheets: Fig. 2b & Fig. S3a, Fig. 2c & Fig. S3e, Fig. 2d & Fig. S3b, Fig. 2e & Fig. S3f, Fig. 2f & Fig. S3c, Fig. 2g & Fig. S3g, Fig. 2h & Fig. S3d, Fig. 2i & Fig. S3h, Fig. 3b & Fig. S4d, Fig. 3c & Fig. S4f, Fig. 3e & Fig. S4g, Fig. 3f & Fig. S4h, Fig. S4a & Fig. S4b, Fig. 4d & Fig. S5b, Fig. 4e & Fig. S5c, Fig. 4f]
